# Supplementary material for: Nonalcoholic Fatty Liver Disease and Risk of Early-Onset Vasomotor Symptoms in Lean and Overweight Premenopausal Women
Source: MDPI journal article supplement (doi:10.3390/nu14142805), 2022-07-08

# **Nonalcoholic fatty liver disease and risk of early-onset vasomotor symptoms in lean and overweight premenopausal women**

Yoosun Cho<sup>a</sup>, Yoosoo Chang<sup>b,c,d,\*</sup>, Hye Rin Choi<sup>b</sup>, Jeonggyu Kang<sup>b</sup>, Ria Kwon<sup>b</sup>, Gayoung Lim<sup>b</sup>, Jiin Ahn<sup>b</sup>, Kye-Hyun Kim<sup>e</sup>, Hoon Kim<sup>f</sup>, Yunsoo Hong<sup>g</sup>, Di Zhao<sup>g</sup>, Sanjay Rampal<sup>h</sup>, Juhee Cho<sup>a,c,g</sup>, Hyun-Young Park<sup>i</sup>, Eliseo Guallar<sup>g</sup>, Seungho Ryu<sup>a,b,c,\*</sup>

## **Supplementary Tables**

**Table S1.** Cross-sectional association between nonalcoholic fatty liver disease and vasomotor symptoms in premenopausal women according to abdominal obesity (n = 4,240)

**Table S2.** Cross-sectional association between nonalcoholic fatty liver disease and vasomotor symptoms in lean and overweight premenopausal women after adjusting for confounders including **depression** (n = 4,242)

**Table S3.** Cross-sectional association between nonalcoholic fatty liver disease and vasomotor symptoms in premenopausal women according to abdominal obesity (n = 4,240)

**Table S4.** Cross-sectional association between nonalcoholic fatty liver disease and vasomotor symptoms (hot flashes or night sweats) in premenopausal women according to abdominal obesity (n = 4,240)

**Table S5.** Cross-sectional association between nonalcoholic fatty liver disease and vasomotor symptoms in premenopausal women according to body fat percentage (n = 4,231)

**Table S6.** Cross-sectional association between nonalcoholic fatty liver disease with or without intermediate-to-high probability of advanced fibrosis based on the Fibrosis-4 index and vasomotor symptoms in premenopausal women according to general obesity (n = 4,232)

**Table S7.** Longitudinal association between nonalcoholic fatty liver disease and vasomotor symptoms in premenopausal women according to adiposity measures

**Figure S1.** Flow chart of the study population (n = 2,349)

**Table S1.** Baseline characteristics of the study participants according to abdominal obesity (n = 4,240)

| Characteristics                 | Overall       |              | Abdominal non-obese |              | Abdominal obese |              |
|---------------------------------|---------------|--------------|---------------------|--------------|-----------------|--------------|
|                                 | NAFLD (−)     | NAFLD (+)    | NAFLD (−)           | NAFLD (+)    | NAFLD (−)       | NAFLD (+)    |
| Number of participants          | 3,438         | 802          | 3,234               | 484          | 204             | 318          |
| Vasomotor symptoms (%)          | 694 (20.19)   | 239 (29.80)  | 640 (19.79)         | 131 (27.07)  | 54 (26.47)      | 108 (33.96)  |
| Age (years) *                   | 44.79 (2.42)  | 45.42 (2.65) | 44.76 (2.40)        | 45.47 (2.67) | 45.31 (2.69)    | 45.34 (2.63) |
| Age of menarche                 | 13.95 (1.39)  | 13.90 (1.41) | 13.96 (1.37)        | 14.01 (1.40) | 13.78 (1.58)    | 13.74 (1.41) |
| Parity (%)                      | 3,055 (92.44) | 713 (92.60)  | 2,874 (92.47)       | 436 (93.36)  | 181 (91.88)     | 277 (91.42)  |
| Menopausal stage                |               |              |                     |              |                 |              |
| Premenopausal (%)               | 3,256 (94.71) | 761 (94.89)  | 3,060 (94.64)       | 453 (93.60)  | 196 (96.08)     | 308 (96.86)  |
| Transitional, early (%)         | 182 (5.29)    | 41 (5.11)    | 174 (5.38)          | 31 (6.40)    | 8 (3.92)        | 10 (3.14)    |
| Current smoker (%)              | 392 (11.40)   | 76 (9.48)    | 365 (11.29)         | 44 (9.09)    | 27 (13.24)      | 32 (10.06)   |
| Alcohol intake (%) <sup>†</sup> | 275 (8.00)    | 77 (9.60)    | 252 (7.79)          | 48 (9.92)    | 23 (11.27)      | 29 (9.12)    |
| Physical activity level         |               |              |                     |              |                 |              |

|                                             |                |                |                |                |                |                |
|---------------------------------------------|----------------|----------------|----------------|----------------|----------------|----------------|
| (%) <sup>‡</sup>                            |                |                |                |                |                |                |
| Inactive                                    | 1,753 (51.26)  | 446 (55.89)    | 1,644 (51.09)  | 260 (54.17)    | 109 (53.96)    | 186 (58.49)    |
| Minimally active                            | 1,138 (33.27)  | 251 (31.45)    | 1,084 (33.69)  | 157 (32.71)    | 54 (26.73)     | 94 (29.56)     |
| HEPA                                        | 529 (15.47)    | 101 (12.66)    | 490 (15.23)    | 63 (13.13)     | 39 (19.31)     | 38 (11.95)     |
| Higher education level<br>(%) <sup>  </sup> | 2,769 (82.00)  | 612 (77.18)    | 2,620 (82.39)  | 376 (78.66)    | 149 (75.63)    | 236 (74.92)    |
| Depression (%)                              | 68 (1.98 )     | 13 (1.62 )     | 65 (2.01)      | 6 (1.24)       | 3 (1.47)       | 7 (2.20)       |
| Hypertension (%)                            | 119 (3.46)     | 87 (10.88)     | 109 (3.37)     | 41 (8.49)      | 10 (4.90)      | 46 (14.51)     |
| Diabetes (%)                                | 30 (0.87)      | 58 (7.23)      | 24 (0.74)      | 23 (4.75)      | 6 (2.94)       | 35 (11.01)     |
| Medication for<br>dyslipidemia              | 37 (1.08)      | 36 (4.49)      | 34 (1.05)      | 16 (3.31)      | 3 (1.47)       | 20 (6.29)      |
| BMI (kg/m <sup>2</sup> ) *                  | 21.71 (2.43)   | 25.52 (3.13)   | 21.39 (2.05)   | 23.81 (1.94)   | 26.70 (2.55)   | 28.12 (2.80)   |
| Systolic BP (mmHg) *                        | 102.34 (10.83) | 109.35 (12.87) | 101.91 (10.63) | 106.89 (12.24) | 109.21 (11.61) | 113.08 (12.93) |
| Diastolic BP (mmHg) *                       | 65.82 (8.73)   | 70.02 (9.61)   | 65.58 (8.69)   | 68.82 (9.48)   | 69.65 (8.59)   | 71.85 (9.54)   |
| Glucose (mg/dl) *                           | 91.56 (9.46)   | 99.61 (19.78)  | 91.41 (9.41)   | 97.23 (15.47)  | 93.80 (9.90)   | 103.22 (24.53) |
| Total cholesterol<br>(mg/dl) *              | 191.39 (29.65) | 200.91 (31.53) | 190.93 (29.66) | 200.64 (30.17) | 198.58 (28.46) | 201.32 (33.54) |

|                         |                |                |                |                |                |                |
|-------------------------|----------------|----------------|----------------|----------------|----------------|----------------|
| LDL-C (mg/dl) *         | 116.30 (27.13) | 132.36 (30.07) | 115.61 (27.03) | 131.32 (28.71) | 127.03 (26.46) | 133.92 (32.00) |
| HDL-C (mg/dl) *         | 68.81 (15.17)  | 56.13 (13.54)  | 69.21 (15.15)  | 57.54 (13.89)  | 62.49 (14.24)  | 53.99 (12.71)  |
| Triglycerides (mg/dl) § | 77.80(34.52)   | 119.54 (61.15) | 76.90 (33.85)  | 114.77 (63.57) | 92.08 (41.35)  | 126.80 (56.60) |

---

Data are presented as \* mean ( $\pm$  standard deviation), § median (interquartile range), or percentage.

Abbreviations: BMI, body mass index; BP, blood pressure; HDL-C, high-density lipoprotein cholesterol; HEPA, health-enhancing physical activity; LDL-C, low-density lipoprotein cholesterol; NAFLD, nonalcoholic fatty liver disease

† $\geq 10$  g ethanol per day

\*  $\geq 3$  times/week

||  $\geq$  college graduate

**Table S2.** Cross-sectional association between NAFLD and vasomotor symptoms in lean and overweight premenopausal women after adjusting for confounders including **depression** (n = 4,242)

| Vasomotor symptoms |                                          |         | Lean      |                  | Overweight       |                  |
|--------------------|------------------------------------------|---------|-----------|------------------|------------------|------------------|
|                    |                                          |         | NAFLD (−) | NAFLD (+)        | NAFLD (−)        | NAFLD (+)        |
| Overall            | No. of cases                             |         | 479       | 45               | 215              | 194              |
|                    | Prevalence (%)                           |         | 18.89     | 26.79            | 23.78            | 30.60            |
|                    | Age-adjusted PR* (95% CI)                |         | reference | 1.39 (1.08–1.81) | 1.24 (1.07–1.42) | 1.57 (1.36–1.82) |
|                    | Multivariable-adjusted PR*,†<br>(95% CI) | Model 1 | reference | 1.38 (1.06–1.79) | 1.22 (1.06–1.41) | 1.49 (1.28–1.73) |
|                    |                                          | Model 2 | reference | 1.38 (1.06–1.80) | 1.22 (1.06–1.41) | 1.49 (1.28–1.73) |
|                    | No. of cases                             |         | 198       | 24               | 101              | 96               |
| Moderate-to-severe | Prevalence (%)                           |         | 7.81      | 14.29            | 11.18            | 15.14            |
|                    | Age-adjusted PR* (95% CI)                |         | reference | 1.79 (1.21–2.65) | 1.40 (1.12–1.76) | 1.87 (1.49–2.36) |
|                    | Multivariable-adjusted PR*,†<br>(95% CI) | Model 1 | reference | 1.73 (1.16–2.57) | 1.38 (1.10–1.74) | 1.74 (1.37–2.21) |
|                    |                                          | Model 2 | reference | 1.74 (1.17–2.59) | 1.38 (1.10–1.74) | 1.75 (1.38–2.22) |

\*Logistic regression models with robust variance were used to estimate PR and 95% CI for prevalent vasomotor symptoms.

†Multivariable model 1 was adjusted for age; education level; parity; physical activity level; smoking status; alcohol intake; age at menarche; and history of hypertension, diabetes, and dyslipidemia. Multivariable model 2 was adjusted for all the same variables as model 1 plus **depression**.

Abbreviations: CI, confidence interval; NAFLD, nonalcoholic fatty liver disease; PR, prevalence ratio

**Table S3.** Cross-sectional association between fatty liver and vasomotor symptoms in premenopausal women according to abdominal obesity (n = 4,240)

| Vasomotor symptoms |                                                   | Abdominal non-obese |                  | Abdominal obese  |                  |
|--------------------|---------------------------------------------------|---------------------|------------------|------------------|------------------|
|                    |                                                   | NAFLD (–)           | NAFLD (+)        | NAFLD (–)        | NAFLD (+)        |
| Overall            | No. of cases                                      | 640                 | 131              | 54               | 108              |
|                    | Prevalence (%)                                    | 19.79               | 27.07            | 26.47            | 33.96            |
|                    | Age-adjusted PR* (95% CI)                         | reference           | 1.33 (1.13–1.57) | 1.31 (1.03–1.66) | 1.68 (1.42–1.99) |
|                    | Multivariable-adjusted PR <sup>*,†</sup> (95% CI) | reference           | 1.23 (1.03–1.47) | 1.16 (0.90–1.51) | 1.41 (1.15–1.73) |
| Moderate-to-severe | No. of cases                                      | 265                 | 72               | 34               | 48               |
|                    | Prevalence (%)                                    | 8.20                | 14.88            | 16.67            | 15.09            |
|                    | Age-adjusted PR* (95% CI)                         | reference           | 1.76 (1.38–2.24) | 1.98 (1.43–2.76) | 1.80 (1.35–2.39) |
|                    | Multivariable-adjusted PR <sup>*,†</sup> (95% CI) | reference           | 1.59 (1.21–2.08) | 1.73 (1.19–2.51) | 1.45 (1.03–2.04) |

\*Logistic regression models with robust variance were used to estimate PRs and 95% CIs for prevalent vasomotor symptoms.

†The multivariable model was adjusted for age; body mass index; education level; parity; physical activity level; smoking status; alcohol intake; age at menarche; and history of hypertension, diabetes, and dyslipidemia.

Abbreviations: CI, confidence interval; NAFLD, nonalcoholic fatty liver disease; PR, prevalence ratio.

**Table S4.** Cross-sectional association between fatty liver and vasomotor symptoms (hot flashes or night sweats) in premenopausal women according to abdominal obesity (n = 4,240)

|             |                                     | Abdominal non-obese |                  | Abdominal obese  |                  |
|-------------|-------------------------------------|---------------------|------------------|------------------|------------------|
|             |                                     | NAFLD (–)           | NAFLD (+)        | NAFLD (–)        | NAFLD (+)        |
| Hot flash   | No. of cases                        | 533                 | 113              | 46               | 95               |
|             | Prevalence (%)                      | 16.48               | 23.40            | 22.55            | 29.87            |
|             | Age-adjusted PR* (95% CI)           | reference           | 1.39 (1.16–1.66) | 1.35 (1.03–1.76) | 1.78 (1.48–2.15) |
|             | Multivariable-adjusted PR* (95% CI) | reference           | 1.26 (1.03–1.53) | 1.15 (0.86–1.50) | 1.44 (1.15–1.81) |
|             | No. of cases                        | 389                 | 86               | 35               | 69               |
| Night sweat | Prevalence (%)                      | 11.98               | 17.84            | 17.24            | 21.70            |
|             | Age-adjusted PR* (95% CI)           | reference           | 1.46 (1.17–1.80) | 1.41 (1.03–1.94) | 1.78 (1.41–1.23) |
|             | Multivariable-adjusted PR*,† (95%)  | reference           | 1.41 (1.11–1.78) | 1.36 (0.95–1.94) | 1.59 (1.20–2.01) |
|             |                                     |                     |                  |                  |                  |

\*Logistic regression models with robust variance were used to estimate PRs and 95% CIs for prevalent vasomotor symptoms.

\*,†The multivariable model was adjusted for age; body mass index; education level; parity; physical activity level; smoking status; alcohol intake; age at menarche; and history of hypertension, diabetes, and dyslipidemia.

Abbreviations: CI, confidence interval; NAFLD, nonalcoholic fatty liver disease; PR, prevalence ratio.



**Table S5.** Cross-sectional association between nonalcoholic fatty liver disease and vasomotor symptoms in premenopausal women according to body fat percentage (n = 4,231)

| Vasomotor symptoms |                                                   | Body fat percentage <35% |                  | Body fat percentage ≥35% |                  |
|--------------------|---------------------------------------------------|--------------------------|------------------|--------------------------|------------------|
|                    |                                                   | NAFLD (–)                | NAFLD (+)        | NAFLD (–)                | NAFLD (+)        |
| Overall            | No. of cases                                      | 574                      | 102              | 120                      | 137              |
|                    | Prevalence (%)                                    | 19.31                    | 26.63            | 25.70                    | 32.70            |
|                    | Age-adjusted PR* (95% CI)                         | Reference                | 1.33 (1.11–1.60) | 1.32 (1.11–1.57)         | 1.67 (1.43–1.95) |
|                    | Multivariable-adjusted PR <sup>*,†</sup> (95% CI) | Reference                | 1.24 (1.01–1.51) | 1.22 (1.00–1.49)         | 1.47 (1.21–1.79) |
| Moderate-to-severe | No. of cases                                      | 237                      | 55               | 62                       | 65               |
|                    | Prevalence (%)                                    | 7.98                     | 14.36            | 13.28                    | 15.51            |
|                    | Age-adjusted PR* (95% CI)                         | Reference                | 1.73 (1.31–2.27) | 1.65 (1.27–2.14)         | 1.91 (1.48–2.46) |
|                    | Multivariable-adjusted PR <sup>*,†</sup> (95% CI) | Reference                | 1.56 (1.15–2.12) | 1.46 (1.08–1.99)         | 1.60 (1.16–2.21) |

\*Logistic regression models with robust variance were used to estimate PR and 95% CI for prevalent vasomotor symptoms.

†The multivariable model was adjusted for age; body mass index; education level; parity; physical activity level; smoking status; alcohol intake; age at menarche; and history of hypertension, diabetes, and dyslipidemia

Abbreviations: CI, confidence interval; NAFLD, nonalcoholic fatty liver disease; PR, prevalence ratio

**Table S6.** Cross-sectional association between nonalcoholic fatty liver disease with or without intermediate-to-high probability of advanced fibrosis based on the Fibrosis-4 index and vasomotor symptoms in premenopausal women according to general obesity (n = 4,232)

|                |                                              | Lean                      |                                    |                                                   | Overweight              |                                    |                                                    |
|----------------|----------------------------------------------|---------------------------|------------------------------------|---------------------------------------------------|-------------------------|------------------------------------|----------------------------------------------------|
|                |                                              | NAFLD<br>(-)<br>(n=2,536) | NAFLD plus low<br>FIB-4<br>(n=162) | NAFLD plus<br>Intermediate/high<br>FIB-4<br>(n=6) | NAFLD<br>(-)<br>(n=904) | NAFLD plus low<br>FIB-4<br>(n=617) | NAFLD plus<br>Intermediate/high<br>FIB-4<br>(n=17) |
| No. of cases   |                                              | 479                       | 43                                 | 2                                                 | 215                     | 186                                | 8                                                  |
| Prevalence (%) |                                              | 18.89                     | 26.54                              | 33.33                                             | 23.78                   | 30.15                              | 47.06                                              |
| Overall<br>VMS | Age-adjusted<br>PR* (95% CI)                 | Reference                 | 1.38 (1.06–1.81)                   | 1.58 (0.51–4.87)                                  | 1.24 (1.07–1.42)        | 1.55 (1.34–1.79)                   | 2.39 (1.45–3.95)                                   |
|                | Multivariable-<br>adjusted PR*,†<br>(95% CI) | Reference                 | 1.37 (1.05–1.79)                   | 1.46 (0.47–4.50)                                  | 1.22 (1.06–1.41)        | 1.46 (1.26–1.70)                   | 2.33 (1.40–3.89)                                   |

\*Logistic regression models with robust variance were used to estimate PR and 95% CI for prevalent vasomotor symptoms.

†The multivariable model was adjusted for age, education level, parity, physical activity level, smoking status, alcohol intake, age at menarche, and history of hypertension and diabetes.

Abbreviations: CI, confidence interval; FIB-4, Fibrosis-4 index; NAFLD, nonalcoholic fatty liver disease; PR, prevalence ratio; VMS, vasomotor symptoms

**Table S7.** Longitudinal association between fatty liver and vasomotor symptoms in premenopausal women according to adiposity measures

| Type                                   | Person-years (PY) | No. of cases | Incident rate<br>(cases per 100 PY) | Age-adjusted HR (95%<br>CI) | Multivariable-adjusted<br>HR<br>(95% CI) |
|----------------------------------------|-------------------|--------------|-------------------------------------|-----------------------------|------------------------------------------|
| <b>General obesity (n = 2,349)</b>     |                   |              |                                     |                             |                                          |
| Lean - NAFLD (–)                       | 6149.65           | 579          | 9.42                                | reference                   | reference                                |
| Lean - NAFLD (+)                       | 358.33            | 39           | 10.88                               | 1.15 (0.83-1.59)            | 1.19 (0.85-1.65)                         |
| Overweight - NAFLD (–)                 | 1956.87           | 232          | 11.86                               | 1.28 (1.09-1.49)            | 1.28 (1.09-1.49)                         |
| Overweight - NAFLD (+)                 | 1194.82           | 152          | 12.72                               | 1.30 (1.09-1.56)            | 1.31 (1.09-1.59)                         |
| <b>Abdominal obesity (n = 2,348)</b>   |                   |              |                                     |                             |                                          |
| Nonobese - NAFLD (–)                   | 7645.51           | 748          | 9.78                                | reference                   | reference                                |
| Nonobese - NAFLD (+)                   | 964.2             | 123          | 12.76                               | 1.30 (1.07-1.58)            | 1.19 (0.96-1.47)                         |
| Obese - NAFLD (–)                      | 455.1             | 62           | 13.62                               | 1.42 (1.09-1.85)            | 1.26 (0.94-1.69)                         |
| Obese - NAFLD (+)                      | 588.95            | 68           | 11.55                               | 1.09 (0.85-1.41)            | 0.98 (0.74-1.31)                         |
| <b>Body fat percentage (n = 2,349)</b> |                   |              |                                     |                             |                                          |
| <35% - NAFLD (–)                       | 7140.59           | 703          | 9.85                                | reference                   | reference                                |
| <35% - NAFLD (+)                       | 788.09            | 98           | 12.44                               | 1.22 (0.99-1.52)            | 1.11 (0.88-1.40)                         |
| ≥35% - NAFLD (–)                       | 965.93            | 108          | 11.18                               | 1.17 (0.95-1.44)            | 1.06 (0.84-1.34)                         |

|                  |        |    |       |                  |                  |
|------------------|--------|----|-------|------------------|------------------|
| ≥35% - NAFLD (+) | 765.06 | 93 | 12.16 | 1.20 (0.96-1.49) | 1.07 (0.83-1.38) |
|------------------|--------|----|-------|------------------|------------------|

---

Abbreviations: CI, confidence interval; HR, hazard ratio; VMS, vasomotor symptoms.

\*Parametric proportional hazard models were used. The multivariable model was adjusted for age; education level; parity; physical activity level; smoking status; alcohol intake; age at menarche; and history of hypertension, diabetes, dyslipidemia, and body mass index (abdominal obesity and body fat percent only)

**Figure S1.** Flow chart of the study population (n = 2,349)

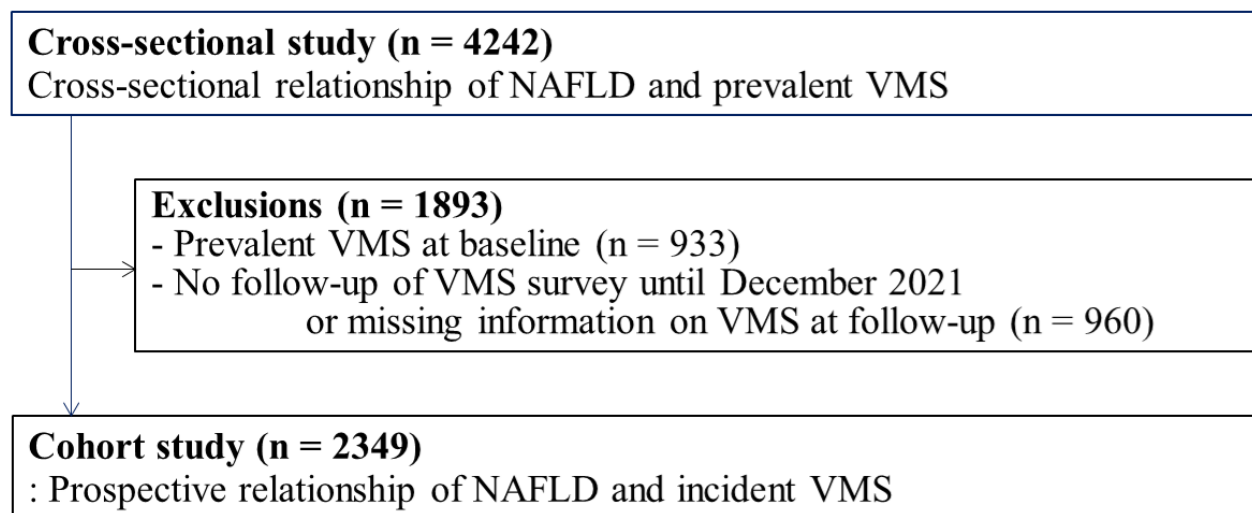

Supplement: s1 [file s1]
